# Supplementary material for: T-Bet and Eomes Regulate the Balance between the Effector/Central Memory T Cells versus Memory Stem Like T Cells
Source: PubMed Central journal article supplement (PMC3694876; doi:10.1371/journal.pone.0067401), 2013-06-27
Supplement: pone.0067401.s001.pdf [file pone.0067401.s001.pdf]

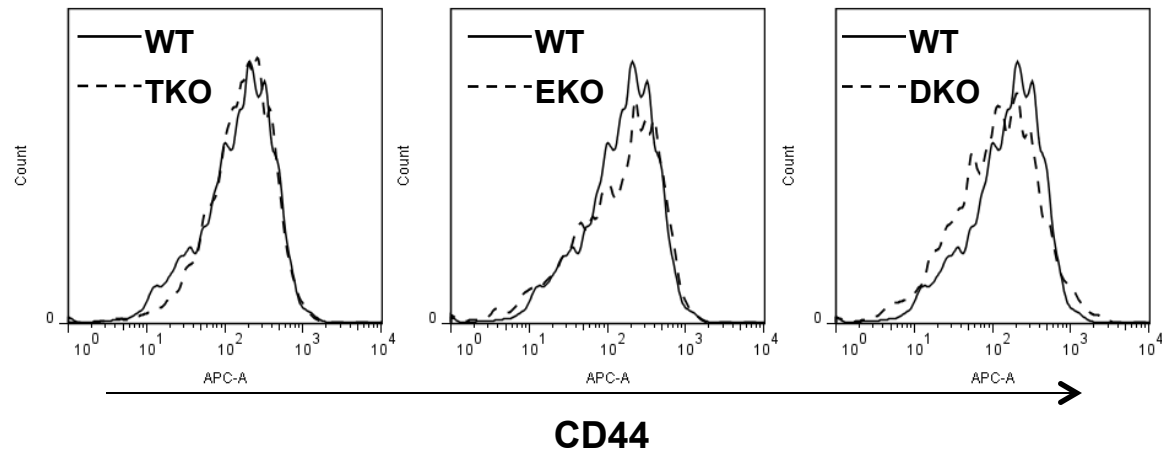

**Figure S1. Up-regulation of CD44 on pmel-1 T cells after culture.** WT, T-bet<sup>-/-</sup>, Eomes<sup>-/-</sup>, or T-bet/Eomes DKO pmel-1 T cells which have been cultured in Th1 conditions for 3 days. The expression of CD44 on these cells was analyzed by flow cytometry. Data represents three independent experiments. One mouse from each strain was used in each experiment.

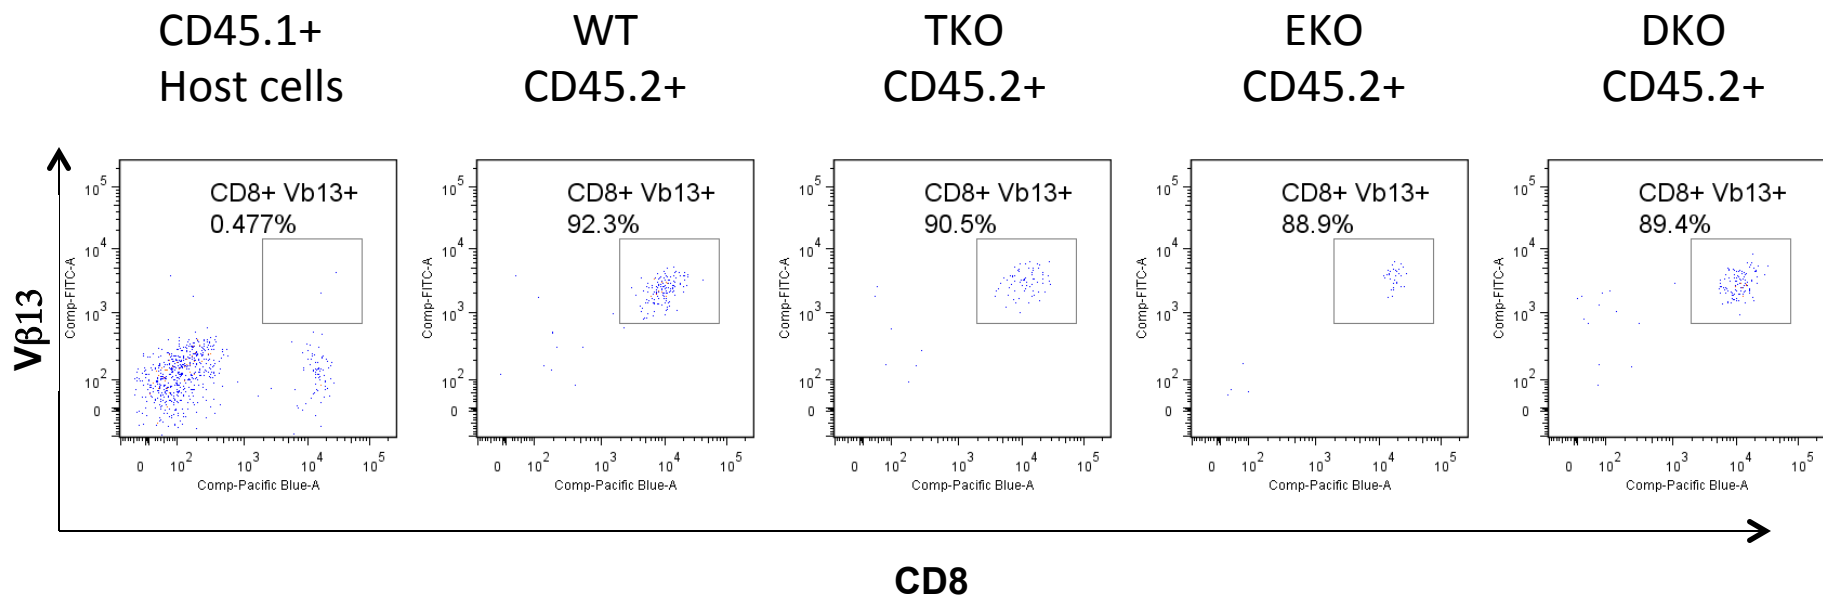

**Figure S2. Pmel-1 T cells were the majority of the adoptively transferred cells.** B6-LY5.2/Cr mice were challenged with  $3 \times 10^5$  B16F0 cells *i.d.* 6 days later, mice were irradiated at 500 rad. On day 7, the mice were adoptively transferred with  $5 \times 10^5$  WT, T-bet<sup>-/-</sup>, Eomes<sup>-/-</sup>, or T-bet/Eomes DKO pmel-1 T cells which had been cultured in Th1 conditions for 3 days. Mice were bled three days after T cell infusion. The percentage CD8<sup>+</sup> Vβ13<sup>+</sup> (pmel-1) T cells among the donor cells (CD45.2<sup>+</sup>) cells was determined by flow cytometry and the representative dot plots were shown.

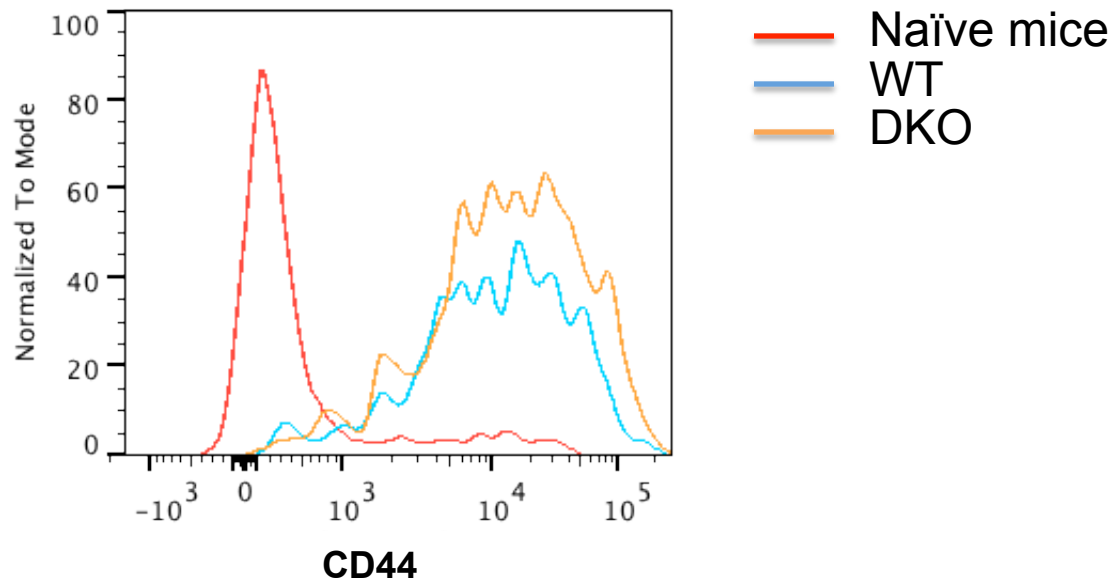

**Figure S3. Up-regulation of CD44 on memory pmel-1 T cells after ex vivo re-stimulation.** B6-LY5.2/Cr mice were irradiated at 500 rad, within 24 hours of irradiation, mice were adoptively transferred with  $4 \times 10^6$  pmel-1 T cells (WT and DKO) which have been cultured in Th1 conditions for 4 days. Thirty days post T cell infusion, spleens were harvested. Splenocytes were stimulated with 0.01 mM gp100<sub>25-33</sub> peptide for 72 h hours. Then the donor cells (CD45.2<sup>+</sup>CD8<sup>+</sup>) were analyzed by flow cytometry for CD44 expression (WT denotes wild type donor cells, DKO denotes T-bet <sup>-/-</sup> Eomes <sup>-/-</sup> donor cells, and naïve mice denote CD8 T cells from unmanipulated wild type mice which were used as control).
